# Supplementary material for: Orf Virus IL-10 and VEGF-E Act Synergistically to Enhance Healing of Cutaneous Wounds in Mice
Source: MDPI journal article supplement (doi:10.3390/jcm9041085), 2020-04-11
Supplement: s1 [file s1]

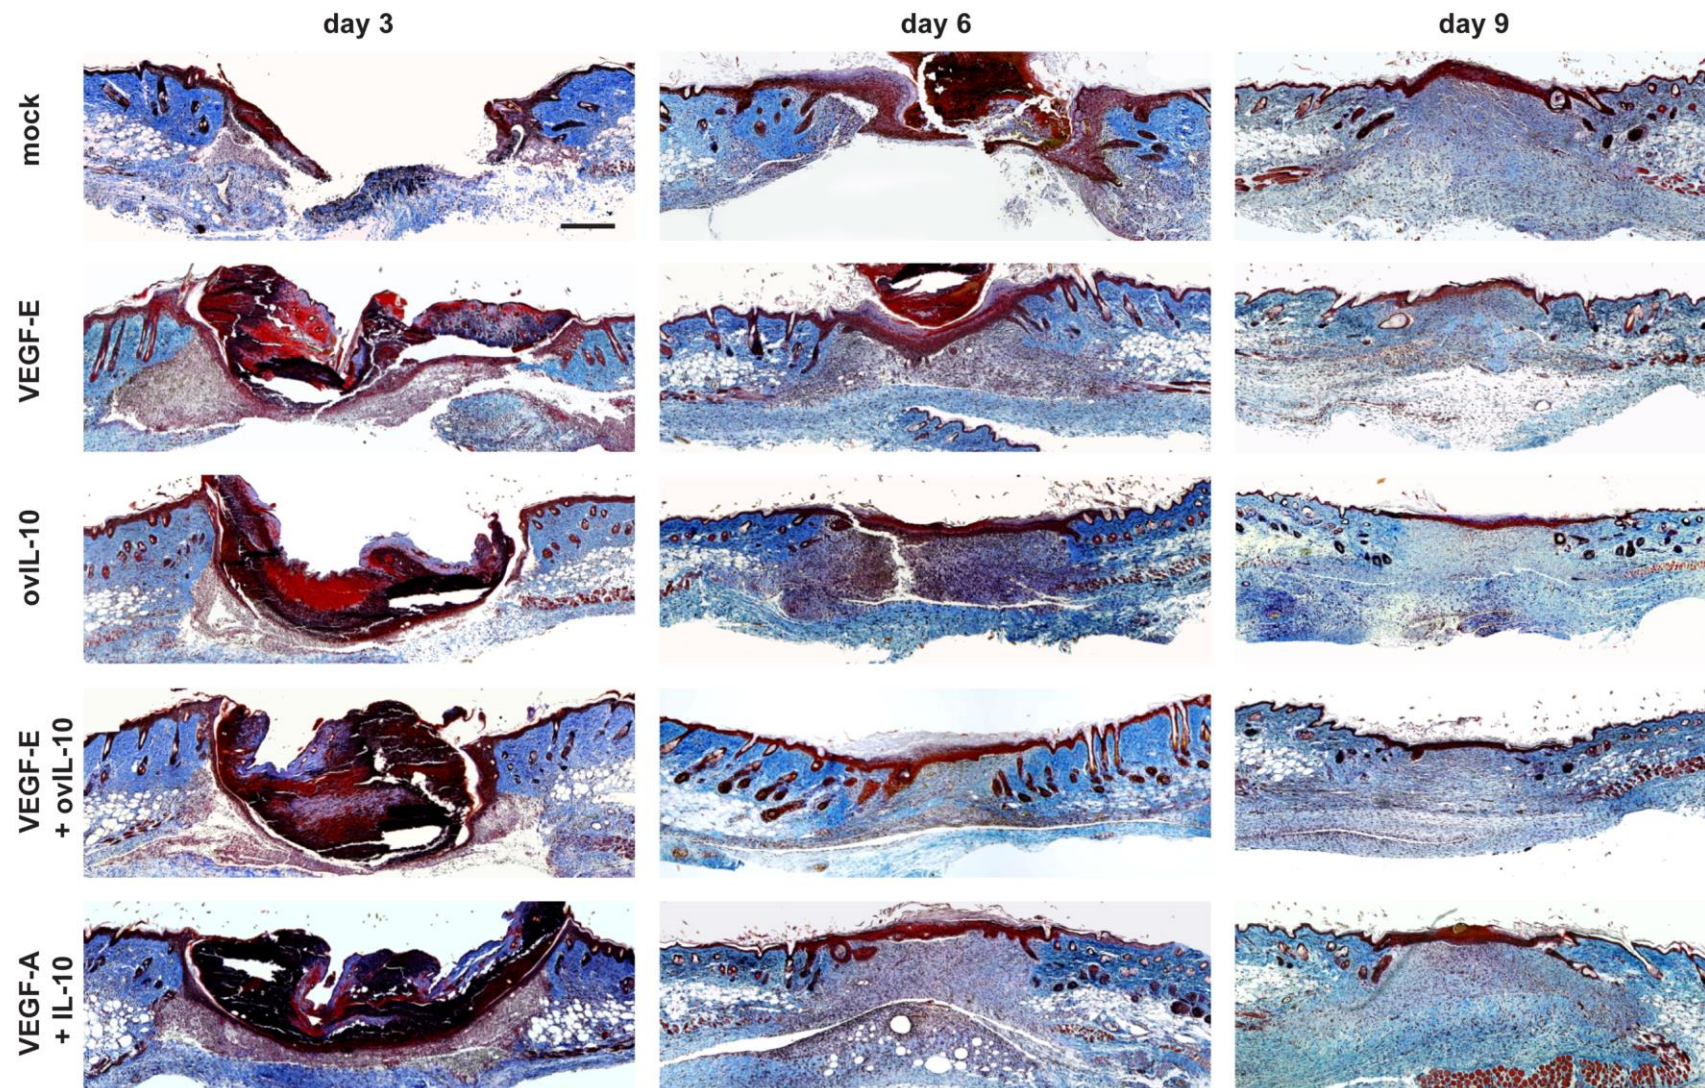

**Figure S1.** Representative images of MSB trichrome-stained wound sections, taken at 3, 6 and 9 days post-wounding, from mice treated by SC injection with saline (mock), VEGF-E, ovIL-10, VEGF-E and ovIL-10, or VEGF-A and IL-10. Scale bar = 150 $\mu$ m.
